1 **Research Article**

2 Sediment-associated microbial community profiling: sample pre-processing through  
3 sequential membrane filtration for 16s rDNA amplicon sequencing

4 Running Head: Pre-processing for Sediment Microbial Community Profiling

5 **Authors and Affiliations**

6 Joeselle M. Serrana<sup>1,2,3</sup> and Kozo Watanabe<sup>1,2,3\*</sup>

7 <sup>1</sup>Center for Marine Environmental Studies, Ehime University, Bunkyo-cho 3, Matsuyama, Ehime 790-8577,  
8 Japan

9 <sup>2</sup>Graduate School of Science and Engineering, Ehime University, Bunkyo-cho 3, Matsuyama, Ehime 790-  
10 8577, Japan

11 <sup>3</sup>Biological Control Research Unit, Center for Natural Sciences and Environmental Research, De La Salle  
12 University, 2401 Taft Avenue, Manila 1004, Philippines

13 **\*corresponding author**

14 Prof. Kozo Watanabe, PhD

15 E-mail Address: [watanabe.kozo.mj@ehime-u.ac.jp](mailto:watanabe.kozo.mj@ehime-u.ac.jp)

16 Phone & Fax Number: +81 (0) 89 927 9847

## 17 **ABSTRACT**

18 Sequential membrane filtration as a pre-processing step for the isolation of  
19 microorganisms could provide good quality and integrity DNA that can be preserved and  
20 kept at ambient temperatures before community profiling through culture-independent  
21 molecular techniques, e.g., 16s rDNA amplicon sequencing. Here, we assessed the  
22 impact of pre-processing sediment samples by sequential membrane filtration (from 10,  
23 5 to 0.22  $\mu\text{m}$  pore size membrane filters) for 16s rDNA-based community profiling of  
24 sediment-associated microorganisms. Specifically, we examined if there would be  
25 method-driven differences between non- and pre-processed sediment samples regarding  
26 the quality and quantity of extracted DNA, PCR amplicon, resulting high-throughput  
27 sequencing reads, microbial diversity, and community composition. We found no  
28 significant difference in the quality and quantity of extracted DNA and PCR amplicons  
29 between the two methods. Although we found a significant difference in raw and quality-  
30 filtered reads, read abundance after bioinformatics processing (i.e., denoising and the  
31 chimeric-read filtering steps) were not significantly different. These results suggest that  
32 read abundance after these read processing steps were not influenced by sediment  
33 processing or lack thereof. Although the non- and pre-processed sediment samples had  
34 more unique than shared amplicon sequence variants (ASVs), we report that their shared  
35 ASVs accounted for 74% of both methods' absolute read abundance. More so at the  
36 genus level, the final collection filter identified most of the genera (95% of the reads)  
37 captured from the non-processed samples, with a total of 51 false-negative (2%) and 59  
38 false-positive genera (3%). Accordingly, the diversity estimates and community  
39 composition were not significantly different between the non- and pre-processed  
40 samples. We demonstrate that while there were differences in shared and unique taxa,  
41 both methods revealed comparable microbial diversity and community composition. We  
42 also suggest the inclusion of sequential filters (i.e., pre- and mid-filters) in the community  
43 profiling, given the additional taxa not detected from the non-processed and the final  
44 collection filter. Our observations highlight the feasibility of pre-processing sediment  
45 samples for community analysis and the need to further assess sampling strategies to  
46 help conceptualize appropriate study designs for sediment-associated microbial  
47 community profiling.

48 **Keywords:** sediment-associated, microbial communities, river sediments, sequential  
49 membrane filtration, 16s rDNA amplicon sequencing.

## 50 INTRODUCTION

51 Microorganisms have long been recognized as useful bioindicators for biomonitoring and  
52 ecological assessment of freshwater ecosystems (Payne, 2013; Amleida et al., 2014;  
53 Pawlowski et al., 2016). Recent studies took advantage of high-throughput sequencing  
54 (HTS) to characterize freshwater sediment-associated microorganisms for impact  
55 assessment of anthropogenic activities and environmental factors on diversity and  
56 composition and their functions (e.g., Stern et al., 2017, Liao et al., 2019). In particular,  
57 16s rDNA amplicon sequencing is a relatively faster and cheaper approach providing  
58 substantially higher taxonomic resolution (Singer et al., 2016), with the capability of  
59 detecting unculturable, rare, and novel microorganisms (Browne et al., 2016) in  
60 comparison to the conventional strategies, e.g., culture-dependent methods (Fransoza  
61 et al., 2015) for microbial community profiling.

62 Most studies would directly extract microbial DNA from sediment samples, amplify a  
63 target hypervariable region of the 16s rDNA gene through polymerase chain reaction  
64 (PCR), process for amplicon library construction, and sequence on a high-throughput  
65 platform (e.g., Illumina-based technologies). One major challenge with such an approach  
66 would be the isolation and capture of good quality and quantity DNA from sediment  
67 samples (Harnpicharnchai et al., 2007; Solomon et al., 2016), which mostly contain  
68 impurities that inhibit amplification through PCR (Albers et al., 2013). Various commercial  
69 extraction kits are available for the rapid processing of environmental samples tailored to  
70 yield abundant and high-quality DNA minimizing the effects of enzyme inhibitors, e.g.,  
71 humic acid, polysaccharides, metals, etc. that must be removed before amplification with  
72 the help of proprietary chemicals (Kosch and Summer, 2013; Ni et al., 2016; Lear et al.,  
73 2018). However, most of these kits commonly rely on DNA-binding steps via silica spin  
74 columns for DNA purification and concentration. This procedure possibly results in DNA  
75 loss due to the competitive column-binding of organic matter (Lloyd, MacGregor, and  
76 Teske, 2010) that has been reported to selectively retain high molecular-weight DNA  
77 fragments (Rohland et al., 2018). Furthermore, collected sediments and other organic  
78 matter usually result in a large sample volume that requires proper processing so that  
79 DNA representing the whole community can be extracted, similar to environmental DNA  
80 samples (Aylagas et al., 2016).

81 Pre-processing sediment samples by multi-level or sequential membrane filtration have  
82 been reported to efficiently isolate high-quality DNA while reducing inhibitory enzyme

83 compounds (Solomon et al., 2016; Kachiprath et al., 2017; Mathai et al., 2019; Sakami,  
84 2019). Sequential filtration has been used to concentrate microbial biomass and assess  
85 communities based on size fractions using filter membranes with different pore sizes  
86 (Padilla et al., 2015; Bae, Lyons, and Onstad, 2019). A pre-filter of larger pore size (1.0  
87 to 30  $\mu\text{m}$ ) and a collection filter of smaller size (0.22  $\mu\text{m}$ ) are commonly used in-line series  
88 of filters (Stewart et al., 2012; Liu et al., 2017) to efficiently capture viruses, bacteria, and  
89 parasites based on size exclusion (Hill et al., 2007). DNA is then extracted from the final  
90 collection filter to separate targeted microorganisms from the comparatively larger  
91 eukaryotic cells (e.g., Smith et al., 2017) or to remove large particle-associated microbes  
92 from the free-living fraction (e.g., Teeling et al., 2012; Smith et al., 2013; Orsi et al., 2015;  
93 Padilla et al., 2015; Schultz et al., 2020).

94 Previous studies have characterized and compared the microbial community structure of  
95 various collection strategies against *in situ* or on-site filtration of particle or sediment  
96 collected samples, mainly from marine environments (e.g., Puigcorb  et al., 2020;  
97 Torres-Beltr n et al., 2019). On-site filtration keeps the sampled microbial communities  
98 *in situ* conditions while reducing the time between collection and storage (Puigcorb  et  
99 al., 2020). The microorganisms from environmental samples should be inactivated right  
100 after collection without significant damage to their DNA (Song et al., 2016). Managing  
101 this time is critical to prevent bacterial overgrowth or taxonomically biased DNA damage  
102 and degradation (Hugerth and Andersson, 2017).

103 Integrating filtration as a pre-processing step for the isolation of microorganisms could  
104 provide good quality and integrity DNA from sediment samples that can be preserved  
105 sufficiently well and kept at ambient temperatures before DNA extraction and library  
106 construction for HTS-analyses. Most of the studies on applying pre-processing sediment  
107 samples by sequential membrane filtration focused on the quality assessment and  
108 efficiency of the extracted metagenomic DNA. Solomon et al. (2016) demonstrated that  
109 community DNA with minimal shearing was obtained from pre-processing marine  
110 sediment samples and performed PCR amplification of the 16S rDNA gene to confirm  
111 that the filtration method isolated high-quality DNA. A similar protocol was employed to  
112 process arctic sediment samples to characterize the bacterial community structure by  
113 16S rDNA amplicon sequencing (Kachiprath et al., 2017). However, there is no  
114 comprehensive information on the potential biases of sequential membrane filtration on  
115 the retained microbial taxa compared to its non-processed counterpart, specifically  
116 whether sample pre-processing via sequential filtration compare to non-processed

117 community profiles for quantitative measurements of freshwater microbial diversity and  
118 community structure.

119 Here, we examined if there would be method-driven differences between non- and pre-  
120 processed sediment samples (represented by the collection filter) by sequential  
121 membrane filtration for microbial community profiling through 16S rDNA amplicon  
122 sequencing. Specifically, we evaluated the impact of pre-processing on the quality and  
123 quantity of extracted DNA, PCR amplicon, resulting HTS-reads, microbial diversity, and  
124 community composition with the non-processed sediment as the basis of comparison.  
125 Given the assumption that membrane filters of different size fractions (i.e., samples  
126 filtered from membranes of different pore sizes) retain different microbial biomass, we  
127 also assessed the difference in relative abundances, composition, and diversity of  
128 microbial taxa retained between each filter fractions. We provided the first comparison of  
129 the two approaches using 16S rDNA amplicon sequencing for sediment-associated  
130 microbial community profiling. Understanding the influence of pre-processing sediment  
131 samples for community analysis would be vital for conceptualizing appropriate study  
132 designs for sediment-associated microbial community profiling through molecular  
133 methods.

## 134 **MATERIALS AND METHODS**

### 135 *Sediment Collection and Sample Pre-processing*

136 The Trinity River is a large gravel-bed river impounded by the Trinity Dam (164 m a.b.l.  
137 and 3020 million m<sup>3</sup> storage) and the smaller Lewiston Dam (28 m a.b.l. and 18 million  
138 m<sup>3</sup> storage) in northern California, USA. It is under current dam operating guidelines with  
139 a mean annual flood of approximately 180 m<sup>3</sup>/s (Gaeuman et al., 2014). Sediment  
140 samples from three sites (i.e., sites A and C are from up-welling zones; site B from a  
141 down-welling zone) were collected approximately 10 cm below the submerged surface  
142 of selected gravel bars in the Trinity River assessed in the study of Serrana et al. (2020).  
143 The samples were stored in 50 ml sterile falcon tubes and immediately fixed with 99.5%  
144 molecular grade ethanol upon collection. The collected sediment samples were mainly  
145 composed of coarse sediments ranging from 1 to 5 mm in diameter, containing smaller  
146 sand grains and fine particulate mass. Pre-processing of sediment samples was done  
147 two to four hours after collection.

148 The experimental procedure of the sediment-associated microbial community profiling  
149 employed in this study is illustrated in **Figure 1**. Subsamples of ~600 mg each were  
150 aliquoted for sequential membrane filtration. The subsamples were resuspended in  
151 separate 50 ml solutions containing 0.22  $\mu\text{m}$  filtered river water with Tween 20 (at a  
152 concentration of 1 ml l<sup>-1</sup> v/v), agitated and mixed via a magnetic stirrer for 30 min. The  
153 resuspended subsamples were then filtered through a pre-filter with a 10  $\mu\text{m}$  pore size  
154 (Nuclepore™ hydrophilic membrane filter paper; Whatman, Tokyo, Japan), followed by a  
155 mid-filter of 5  $\mu\text{m}$  pore size (Mixed cellulose ester membrane filter; Merck Millipore, USA)  
156 and finally through a 0.22  $\mu\text{m}$  collection filter (Cellulose mixed ester membrane filter;  
157 Merck Millipore, USA). The pre-processed samples were then kept in 2 ml  
158 microcentrifuge tubes, immediately fixed with 99.5% molecular grade ethanol. For non-  
159 processed sediments, triplicate subsamples of 200 mg were taken from the collected  
160 samples preserved in 50 ml Falcon tubes with 99.5% molecular grade ethanol.

#### 161 *DNA Extraction, PCR Amplification, and Sequencing*

162 Before DNA extraction, the membrane filters were taken out from the collection tubes  
163 and dried at room temperature until most of the preserving ethanol evaporated. The  
164 membrane filter tubes (ethanol with finer particulate mass) and the subsampled non-  
165 processed sediments were then subjected to high speed (12,000 rpm) centrifugation for  
166 30 min to resuspend the remaining fine particles and sediments to the bottom of each  
167 tube. The supernatant was removed carefully, and the tubes were dried at room  
168 temperature to evaporate the remaining ethanol. The dried membrane filters were cut  
169 into smaller pieces using sterile scissors and placed back into their original tubes. The  
170 samples were then suspended in a buffer consisting of 10 mM EDTA, 50 mM Tris-HCl,  
171 50 mM Na<sub>2</sub>HPO<sub>4</sub>·7H<sub>2</sub>O at pH 8.0 to remove PCR inhibitors (Zhou et al. 1996; Poulain et  
172 al., 2015). Genomic DNA was extracted from both the non-processed and filtered  
173 subsamples following the protocol of Zhou et al. (1996) (as employed in Solomon et al.,  
174 2016). The DNA extracted from non-processed sediment subsamples were combined  
175 accordingly before amplification. The quality and quantity of total DNA extracted was  
176 initially assessed with a NanoDrop spectrophotometer (NanoDrop 2000, Thermo  
177 Scientific).

178 Amplicon library preparation was carried out through a one-step PCR amplification using  
179 modified fusion primers of the V4 hypervariable region of the 16S SSU rRNA gene (i.e.,  
180 515F and 806R; Caporaso et al., 2012), with 12-base error-correcting Golay codes on

181 both forward and reverse primers. The PCR was performed with high-fidelity Phusion  
182 polymerase (Thermo Fisher Scientific Inc.) in a T100 Thermal Cycler (Bio-Rad  
183 Laboratories, USA). The 25  $\mu$ l PCR reaction mixture consisted of 5  $\mu$ l of 5X Phusion GC  
184 Buffer, 1.25  $\mu$ l each of the forward and reverse primers (10  $\mu$ M), two  $\mu$ l dNTPs (2.5 mM),  
185 0.75  $\mu$ l DMSO, 0.25  $\mu$ l Phusion Polymerase (1 U) and one  $\mu$ l of template DNA. The PCR  
186 condition followed was initial denaturation at 98°C for 3 min, 25 cycles of denaturation at  
187 98°C for 15 s, annealing at 50°C for 30 s, and extension at 72°C for 30 s, followed by a  
188 final extension period at 72°C for 7 min.

189 Post-amplification, library-quality control was performed by checking the library size  
190 distribution via the High-Sensitivity DNA chip (Agilent BioAnalyzer). The libraries were  
191 purified and size selected using SPRI beads (AmpureXP, Beckman Coulter Genomics).  
192 Amplicon size was ~400-bp. Triplicate quantitative PCR reactions at appropriate dilutions  
193 were performed to quantify the amplicon libraries with the KAPPA Illumina Library qPCR  
194 Quantification kit (Kappa Biosystems, Wilmington, MA, USA). Negative control was used  
195 to monitor contamination from DNA extraction and PCR to post-amplification library  
196 quantity and quality verification; however, no quantifiable amplicon was detected for  
197 further analysis. The purified amplicon libraries were then normalized, and equimolar  
198 amounts were pooled. The 4 nM pooled library was sequenced at the Advanced  
199 Research Support Center (ADRES) of Ehime University using the Illumina MiSeq  
200 platform with paired-end reads of 300-bp per read.

### 201 *Read Processing and Taxonomic Assignment*

202 The raw sequence reads generated on the Illumina MiSeq platform were demultiplexed  
203 via the command-line tool Cutadapt v.2.1 (Martin, 2011). The 3,805,575 demultiplexed  
204 sequences were quality screened, processed, and inferred amplicon sequence variants  
205 (ASVs) with the denoising pipeline of the DADA2 v.1.12 package (Callahan et al., 2016)  
206 in R v.3.6.2 (R Core Team, 2019). Based on the read error profiles, the reverse reads  
207 have poor read quality. Low read abundance with acceptable overlaps between the reads  
208 can be accounted for after quality filtering; therefore, only the forward reads were used  
209 in the subsequent analysis. Primer contaminants were excluded, and the reads were  
210 filtered based on quality and identified sequence variants likely to be derived from  
211 sequencing error. ASVs were inferred from the sequence data, subsequently removing  
212 chimeric sequences and singletons. The DADA2 pipeline was implemented to use  
213 sequence error models to correct amplicon errors in ASVs. Reads with a maximum

214 expected error greater than 5 were discarded as a quality filtering measure and truncated  
215 at a read length of 100-bp. The remaining ASV sequences were aligned to the SILVA  
216 database (Pruesse et al., 2007) through the SILVA ACT: Alignment, Classification, and  
217 Tree Service online server ([www.arb-silva.de/aligner](http://www.arb-silva.de/aligner)) (Pruesse, Peplies, and Glöckner,  
218 2012). For this analysis, the small subunit (SSU) category was selected, and a minimum  
219 similarity identity of 0.95 was set with ten neighbors per query sequence. Sequences  
220 below 70% identity were rejected and discarded. The least common ancestor (LCA)  
221 method was used for the taxonomic assignment. Chloroplasts, mitochondria, and  
222 unclassified ASVs were removed, resulting in a total of 2,875 taxonomically assigned  
223 ASVs.

224 The raw sequence data were deposited into the National Center for Biotechnology  
225 Information (NCBI) Sequence Read Archive (SRA) under the accession number  
226 PRJNA559761. The ASV matrix, the taxonomy, and sample table generated in this study  
227 have been deposited in the Figshare data repository (10.6084/m9.figshare.13088834).

#### 228 *Statistical Analysis and Data Visualization*

229 Statistical analyses were performed in R v.3.6.2 (R Core Team, 2019). The significant  
230 differences in the quality and quantity of extracted DNA and PCR amplicon libraries, and  
231 the HTS-reads for each read processing steps between sites (i.e., A, B, C), and filters  
232 [i.e., non-processed (NP), pre-filter (10  $\mu$ m filter, "10"), mid-filter (5  $\mu$ m, "5"), and the  
233 collection filter (0.22  $\mu$ m, "0.22")] were tested via two-way analysis of variance (ANOVA),  
234 and pairwise comparisons via multiple T-tests in the presence of significant main effects  
235 using the `stat_compare_mean()` in the `ggpubr` package (Kassambara, 2018). The  
236 correlation between the extracted DNA and PCR amplicon library concentration and  
237 purity, and between HTS-read count per processing step (i.e., raw reads, quality filtering,  
238 denoising, chimera removal, taxonomic assignment, and ASV count) were tested with  
239 Pearson correlation analyses on log-transformed data. A correlogram with significant  
240 tests was calculated and visualized with the `Hmisc` and `corrplot` packages (Harrell and  
241 Harrell, 2019).

242 Before subsequent statistical analyses, the ASV table was normalized at median  
243 sequencing depth. The shared and unique taxonomic assignment and ASVs between  
244 the groups were visualized with Venn diagrams and UpSetR plots (Lex et al., 2014). The  
245 boxplots were illustrated via `ggplot2` (Wickham, Chang, and Wickham, 2016). The spatial  
246 differences between the microbial communities were visualized using non-metric



247 dimensional scaling (NMDS) based on Bray-Curtis distances with the `plot_ordination()`  
248 function from the `phyloseq` package (McMurdie and Holmes, 2013), and in a hierarchical  
249 clustering dendrogram based on the average-linkage algorithm using the `hclust()`  
250 function. PERMANOVA (permutational multivariate analysis of variance) (vegan;  
251 Oksanen et al., 2013) was performed to identify significant differences in community  
252 composition between filters based on the NMDS ordination.

253 Alpha diversity metrics (i.e., Chao1 richness, Shannon diversity, Pielou's J evenness,  
254 Berger-Parker's dominance, and rarity index) were calculated and visualized based on  
255 the ASV dataset to identify the changes in community structure between the non-  
256 processed and filtered samples using the `plot_alpha_diversities()` function  
257 (`microbiomeutilities`; Sudarshan, Shetty and Lahti, 2018). Significant differences between  
258 the alpha diversity of sites and filters were also tested via ANOVA and pairwise  
259 comparisons via multiple t-tests in the presence of significant main effects. Linear  
260 discriminant analysis (LDA) effect size (LEfSe) (Segata et al., 2011) was performed using  
261 the Python LEfSe package (parameters:  $p < 0.05$ ,  $q < 0.05$ ,  $LDA > 2.0$ ) to identify which  
262 microbial taxa significantly explained differences in community composition between the  
263 filter groups (i.e., NP, 10, 5, 0.22). The LEfSe algorithm was used to determine indicator  
264 taxa considering both the abundance and occurrence of a particular taxon.

## 265 RESULTS

### 266 *DNA Yield, PCR Amplicon, and HTS-read Abundance*

267 The initial concentration and the ratio of absorbance (at 260/280 and 260/230) to assess  
268 the purity of extracted DNA were measured via spectrophotometry (**Table 1**;  
269 **Supplementary Figure 1A** and **1B**). The DNA yield between sites (A, B, and C) and  
270 filters (NP, 10, 5, and 0.22) was higher for sites A and B, and NP and 0.22 filters, but a  
271 significant difference between the observed values were only reported for the sites. A  
272 ratio of  $\sim 1.8$  is generally accepted as pure DNA for the 260/280 ratio. Although sites B  
273 and C, and filters 10 and 5 reported a relatively high 260/280 ratio, ANOVA showed no  
274 significant difference in DNA purity between sites and between filters. The 260/230 ratio  
275 was also relatively low for all samples given the accepted range of 2.0-2.2 for pure nucleic  
276 acid indicative of the presence of contaminants, e.g., EDTA, carbohydrates, and phenol.  
277 It was notable that the mean PCR amplicon library concentration of NP was relatively  
278 lower than those of the filtered samples, given that it has higher extracted DNA  
279 concentration. However, the PCR amplicon library concentrations quantified via qPCR

280 were not significantly different between sites and between filters. The correlation between  
281 extracted DNA and PCR amplicon library concentrations was not significant (Pearson  
282 correlation:  $r = -0.024$ ,  $p = 0.94$ ) (**Supplementary Figure S2**).

283 Based on the site and filter grouping, sites A and C and filters NP, 10, and 0.22 had  
284 higher read abundances (from raw reads to reads with taxonomic assignment) and ASV  
285 counts than site B and filter 5, respectively (**Supplementary Figure S3** and  
286 **Supplementary Table 1**). ANOVA showed no significant difference in read and ASV  
287 counts between the sites, while the raw, filtered (ANOVA;  $p < 0.05$ ), denoised, and non-  
288 chimeric reads (ANOVA;  $p < 0.10$ ) were significantly different between the filters.  
289 Although the amplicon libraries were normalized to equimolar concentrations before  
290 HTS, the NP samples had significantly higher absolute raw read abundance than the  
291 filtered samples (t-test:  $p < 0.05$ ). After quality filtering, NP was only significantly different  
292 against the 5 filters (t-test:  $p = 0.047$ ). Furthermore, the correlations between the read  
293 abundances from raw reads to each processing step were all significantly ( $p < 0.05$ )  
294 positive with strong (Pearson's  $r > 0.60$ ) to very strong (Pearson's  $r > 0.80$ ) correlations  
295 (**Supplementary Figure S2**).

#### 296 *ASV Richness, Taxonomic Diversity, and Community Composition*

297 From the 2,875 ASVs, 2,871 were identified as bacteria, while 4 ASVs were assigned as  
298 archaea (i.e., Nitrosopumilales and Woesearchaeales). We identified a total of 324  
299 microbial genera from 232 families under 161 orders, 85 classes, and 39 phyla, including  
300 unclassified taxa (e.g., Unclassified Bacteria). **Figure 2A** presents the relative  
301 abundance of the sediment-associated microbial phyla grouped per filter. Phyla with high  
302 relative sequence abundances include the Proteobacteria, Bacteroidota, and  
303 Acidobacteria (**Figure 2B**). Rhodobacteriaceae and Vicinamibacteriaceae predominantly  
304 represented non-processed sediments. Whereas Chitinophagaceae, Microscillaceae,  
305 and *Flavobacterium* dominate the 10, 5, and 0.22 filters, respectively (**Supplementary**  
306 **Figure S4**).

307 To explore the difference between the non-processed and collection filter samples, the  
308 shared and unique ASVs and taxa (e.g., Phylum, Class, Order, Family, and Genus)  
309 assigned per filter were visualized via Venn diagrams (**Figure 3A** and **Supplementary**  
310 **Figure S5**) and UpSetR plots (**Figure 3B** and **Supplementary Figure S6**). Notably, the  
311 10 filters always showed the highest ASV count throughout the sites (**Table 1**). When  
312 grouped by filter type, the 10 filters had the highest unique ASV count with 978, followed

313 by 0.22, NP, and 5 with 594, 492, and 121 unique ASVs, respectively. The NP and 0.22  
314 collection filters shared  $63 \pm 89$  (Mean  $\pm$  SD) or a total of 239 ASVs (74% of reads shared)  
315 having  $257 \pm 143$  (total of 493; 16% of reads) and  $215 \pm 81$  (total of 595; 10% of reads)  
316 unique ASVs, respectively. When aggregated at the genus level, the two methods shared  
317  $35 \pm 34$  or a total of 108 genera (95% of reads) with  $54 \pm 40$  (total of 51; 2% of reads)  
318 and  $39 \pm 1$  (total of 59; 3% of reads) unique genera, respectively. Also, the 10 and 5  
319 filters shared 449 ASVs, and no ASV was shared between all four filters.

320 Alpha diversity based on Chao1 richness, Shannon diversity, Pielou's evenness, Berger-  
321 Parker's dominance, and the rarity index is presented in **Supplementary Figure S7**.  
322 ANOVA showed no significant difference between the sites and between filters in  
323 richness, diversity, evenness, dominance, and rarity estimates. Both the NMDS  
324 ordinations of the genus and ASV datasets indicated that the samples cluster based on  
325 the filters as visualized in the ordination space (**Supplementary Figure S8**). Notably,  
326 filters 10 and 5, and NP and 0.22 clustered closely together. The hierarchical clustering  
327 of samples based on the ASV dataset also showed the separation of NP and 0.22 against  
328 the 10 and 5 filters (**Figure 2C**). However, PERMANOVA showed no significant  
329 difference in the community composition of both the genus ( $R^2 = 0.21$ ,  $p = 0.245$ ) and  
330 ASV ( $R^2 = 0.22$ ,  $p = 0.062$ ) datasets.

### 331 *Indicator Taxa Analysis*

332 LEfSe was performed to identify taxa significantly explained differences in the community  
333 compositions between the filter groups. Thirty-five significantly discriminative features out  
334 of 51 were selected before internal Wilcoxon, and 25 had an LDA score  $> 2$ . A cladogram  
335 showing the 25 microbial taxa's phylogenetic distribution significantly associated with  
336 each filter group is presented in **Figure 4A**. The corresponding LDA values for each taxon  
337 are shown in **Figure 4B**.

338 LEfSe analysis showed that the taxa from four families (i.e., Crocinitomicaceae, Env.  
339 OPS 17, Pseudomonadaceae, Rhizobiales *Incertae Sedis*), and two genera (i.e.,  
340 *Polymorphobacter*, *Pseudomonas*) were significantly abundant in NP compared to other  
341 filter groups. For the sequential membrane filters, phylum Elusimicrobiota, four classes  
342 [e.g., Subgroup 22 (Acidobacteriota), JG30-KF-CM66 (Chloroflexi)], four orders (e.g.,  
343 Chitinophagales, Sphingobacteriales), family Acetobacteraceae, and three genera [i.e.,  
344 DEV114 (Pedosphaeracea), *Ferruginibacter*, *Phenylobacterium*] were significantly more  
345 abundant for the 10  $\mu$ m filter, while three orders (i.e., Gemmatales, Haliangiales,

346 Pirellulales), family Haliangiaceae), and two genera (i.e., *Haliangium*, *Fimbriiglobus*)  
347 were significantly more abundant for the 0.22  $\mu\text{m}$  filter. No taxa were found to be  
348 significantly abundant for the 5  $\mu\text{m}$  filter.

## 349 **DISCUSSION**

350 In this study, we assessed whether riverine sediment-associated microorganisms would  
351 differ between non-processed and pre-processed samples by sequential membrane  
352 filtration. We provided the first comparison of the two approaches using 16s rDNA  
353 amplicon sequencing for microbial community profiling. We report that although the non-  
354 and pre-processed samples (represented by the final collection filter, 0.22) had more  
355 unique than shared ASVs, the latter accounted for a total of 239 ASVs that includes 74%  
356 of the reads between the two methods. More so at the genus level, the non- and pre-  
357 processed samples had a relatively high percentage of total shared genus count (108  
358 genera, 50%) that accounts for 95% of the reads' absolute abundance. This showed that  
359 the final collection filter (0.22) captured most of the abundant genus identified from the  
360 non-processed samples. Notably, the collection filter detected a total of 59 more unique  
361 genera (3% of the reads). These false-positive detections suggested that the pre-  
362 processed samples can detect taxa not captured from the non-processed approach.

363 A range of mechanisms potentially drove the false-positive detections. First, this could  
364 be due to the effectiveness of the multiple filtration process to reduce inhibitory  
365 compounds. Sequential-filter isolation techniques have been employed to improve the  
366 yield of environmental DNA by reducing the concentration of inhibitory compounds, e.g.,  
367 humic acid, polysaccharides, metals, etc. (Solomon et al., 2016; Kachiprath et al., 2017;  
368 Hunter et al., 2019). Specifically, sediment samples contain high humic substances,  
369 which are the primary compounds co-extracted with DNA that inhibits enzymes (e.g., *Taq*  
370 polymerase) in PCR reactions (Matheson et al., 2010). The reduction of these inhibition  
371 compounds could have led to the generation of false-positive taxa in relation to the non-  
372 processed samples. However, we observed no significant difference in the quality of  
373 extracted DNA to support reduced inhibitory compounds' influence on the false-positive  
374 detections. Other reasons, such as sequencing depth (the total number of usable reads  
375 from the sequencing machine), have been reported to influence the rate of false-positive  
376 detections in metabarcoding studies (Ficetola, Taberlet, and Coissac, 2016). Insufficient  
377 sequence depth could result in the non-detection of rare taxa. For example, singletons  
378 (single sequence detection, or an OTU/ASV only present in one sample) are usually

379 considered erroneous sequences or artifacts and are usually removed for subsequent  
380 analysis. Increasing the sequencing depth might result in an increase in these reads'  
381 abundances in the sample. Also, method-specific or unique taxa could result from having  
382 abundant taxa with polymorphisms (Laroche et al., 2017). On the other hand, setting a  
383 more stringent parameter for quality filtering could reduce the rate of detecting false  
384 positives (Ficetola et al., 2015; Serrana et al., 2018). Given that we employed a relatively  
385 lax read quality filtering parameter in this study, the false positive detection could result  
386 from low-quality passing reads.

387 On the other hand, the false-negative taxa (51 genera; 2% of the reads) absent from the  
388 collection filter could be microbial groups that passed through the 0.22  $\mu\text{m}$  pore-sized  
389 filter. As previously reported by Maejima et al. (2018), isolated bacteria from lake water  
390 samples belonging to the Proteobacteria, Bacteroidetes, Firmicutes, and Actinobacteria  
391 passed through a 0.22  $\mu\text{m}$  pore size filter. The filtered fractions from  $< 0.2 \mu\text{m}$  filtered  
392 samples that were usually considered "sterile" were found to still contain miniature cells,  
393 ultramicrobacteria (i.e., bacteria whose cell size are smaller than  $0.1 \mu\text{m}^3$ ) and slender  
394 filamentous bacteria (e.g., Oligoflexia, Proteobacteria) overlooking a broad diversity of  
395 filterable agents (Wang et al., 2007; Nakai 2020). However, we observed that the false-  
396 negative taxa had very low read abundance, which could be due to smaller cell size  
397 leading to low DNA yield. This suggests that the microbial groups that possibly passed  
398 through the 0.22  $\mu\text{m}$  pore-sized collection filter were mostly low abundant taxa.  
399 Nonetheless, we observed a low read abundance of these false-positive and negative  
400 detections. As demonstrated from the diversity and community composition analyses  
401 employed in this study, these method-specific taxa would unlikely affect these results.

402 On the other hand, the pre- and mid-filters had a relatively high count of 449 shared and  
403 978 and 121 unique ASVs, respectively. The non-processed samples only had 1 ASV  
404 shared with the pre- and mid-filter, similar to the collection filter. The clear separation  
405 between NP and 0.22 against the 10 and 5 filters was also observed in the NMDS  
406 ordination and the hierarchical clustering. At the genus-level, the pre- and mid-filters had  
407 57 and 6 unique genera. These values added with the genera shared between the two  
408 filters makes a total of 106 captured solely from the pre- and mid-inline filtration. The very  
409 low ASV and low genera shared between non-processed and collection filter against the  
410 pre- and mid- filters suggested that a huge part of the sediment microbial community is  
411 underrepresented or lost from the community profile. A previous study comparing the  
412 prokaryotic and eukaryotic diversity and community composition between pre- and

413 collection filters from lake water samples suggested the possible “pre-filter” bias in the  
414 community structure from the collected biomass (Lanzen et al., 2013). They reported  
415 contrasting read abundance even though most operational taxonomic units (OTUs) were  
416 shared between filters. Sequential filtration of sediments might be a stochastic process  
417 where taxa are presumably retained according to cell size rather than their abundance,  
418 with the rare taxa retained along the previous filtration step (Pinto et al., 2020). We  
419 presented a stronger pre- and mid-filter community composition bias, given that very few  
420 ASVs and taxa were shared between the in-line filters against the non- and pre-  
421 processed samples. Since we observed that certain sediment-associated microbial taxa  
422 were not captured from the non-processed samples, and if only the collection filter is  
423 considered to represent the pre-processed samples' microbial community profile, we  
424 suggest the inclusion of pre-filters in microbial communities' profiling.

425 Statistical analyses revealed that groups based on filter were not significantly different in  
426 the richness, diversity, and evenness estimates of alpha diversity. Although shared taxa  
427 between the two methods were relatively low, community structures based on Bray-Curtis  
428 distance were also not significantly different between the two methods. Bray-Curtis  
429 dissimilarity is sensitive to differences in abundance between taxa, where abundant taxa  
430 are weighted more than the rare ones (Ricotta and Podani, 2017). Although the overall  
431 microbial community composition was not significantly different between the two  
432 methods, the significantly abundant indicator taxa detected between the filter types were  
433 different, primarily due to the variations in the detection of low abundance taxa. Based  
434 on LEfSe, representatives from the Alphaproteobacteria (i.e., Rhizobiales *Incertae Sedis*,  
435 and *Polymorphobacter*), *Pseudomonas* (Pseudomonadaceae) and the  
436 Crocinitomicaceae and the uncultured eubacterium env. OPS 17 were significantly more  
437 abundant in the non-processed sediment samples. The taxa affiliated with the  
438 Alphaproteobacteria have shown a consistent preference for a particle-attached lifestyle  
439 (Mestre et al., 2018). The pre-filter (10 µm filter) had the most significantly more abundant  
440 taxa with representatives from Acetobacteraceae (Alphaproteobacteria),  
441 Acidobacteriota, Bacteroidota, Chloroflexi, and Elusimicrobiota. Candidate microbial  
442 divisions and Chloroflexi have been reported to be primarily recovered when particle  
443 samples were subjected to filtration in situ (Torres-Beltrán et al., 2019). The collection  
444 filter had significantly more abundant *Fimbriiglobus* (Gemmatales), Pirellulales, and  
445 *Haliangium* (Haliangiales) sequences. The first two taxa are classified as members of the  
446 Planctomycetes, while the latter belongs to the Myxococcota. A study evaluating the

447 influence of standard filtration practices on marine particles also reported that  
448 proportional abundances in the pre-filter fraction of Myxococcales (Deltaproteobacteria)  
449 and Planctomycetes increased with filter volume (Padilla et al., 2015). Furthermore, in-  
450 situ filtration (0.4  $\mu\text{m}$  filter) increased the capture of Planctomycetes by fivefold compared  
451 to on-ship in-line filtration (Torres-Beltrán et al., 2019).

452 The isolation and capture of good quality and quantity DNA from sediment samples are  
453 very challenging (Harnpicharnchai et al., 2007; Solomon et al., 2016), and the  
454 preservation medium and the time between collection and storage is critical for particle  
455 or sediment-associated microorganisms to prevent biased overgrowth and DNA damage  
456 before HTS sample processing (Song et al., 2016). We observed that extracted DNA  
457 concentration varied between sites and filters and was relatively high for the NP filters.  
458 However, no significant difference was observed for the DNA yield between the two  
459 methods. PCR amplicon concentration and quality were also not significantly different  
460 between the non-processed and processed samples. Hence, we report that the quantity  
461 and quality of extracted DNA and its PCR amplicon libraries were not significantly  
462 different between the non-processed and processed samples. We should note that we  
463 used the same DNA extraction method for both non-processed and processed samples,  
464 employing the method of Zhou et al. (1996), which includes the removal of PCR inhibitors,  
465 i.e., humic compounds. The chosen DNA extraction method could present different  
466 impacts on the characterization of the overall microbial community composition (Ushio,  
467 2019). Previous studies have investigated the influence of filter types and pore sizes on  
468 DNA yield from aquatic ecosystems (i.e., on environmental DNA, e.g., Robson et al.,  
469 2016; Li et al., 2018). Filters of different pore sizes did not affect the amount of total DNA  
470 recovered and detected species from environmental DNA (Li et al., 2018).

471 The PCR amplicon libraries were normalized before sequencing to assure an even read  
472 distribution for all samples. However, the raw HTS-reads and quality-filtered reads were  
473 significantly different between methods, with the non-processed significantly having the  
474 highest raw read abundance. Interestingly, after the denoising and the chimeric-read  
475 filtering steps, the retained reads from the non-processed sample declined and were not  
476 significantly different between methods. This suggested that the retained read  
477 abundance after the bioinformatics step was not significantly influenced by sediment  
478 processing or lack thereof. Previous studies have reported that higher GC content and  
479 larger insert size decreased the abundance of reads retained after quality filtering  
480 (Huptas et al., 2016). Moreover, fragment length may also impact the base qualities of

481 Illumina reads (Tan et al., 2019). The decline in read abundance of NP (from being  
482 significantly different from the others to insignificant difference) after quality filtering  
483 suggests the possibility of the extracted DNA having either high GC content or large  
484 fragments which reduced the base qualities of the reads.

485 Our time from collection to processing and ethanol preservation of the filtered samples  
486 were from two to four hours. Previous studies reported that larger processing time  
487 between sample collection and filter storage might allow the growth of opportunistic  
488 prokaryotic groups introducing bias by microbial population turnover within the sample  
489 (Puigcorb  et al., 2020). Here the sediments processed for sequential membrane  
490 filtration were from samples that have already been preserved in ethanol; hence, this bias  
491 was not tested in our experimental design. We recommend further assessment of  
492 sediment pre-processing by comparing different filter types and combinations,  
493 preservation medium, sample volume, and the influence of various processing time for  
494 further method evaluation. This will fully present the capability and viability of on-site  
495 sequential membrane filtration as a processing step against the direct collection and  
496 preservation of riverine sediment samples.

## 497 **CONCLUSION**

498 In the present study, we found no significant difference in the quantity and quality of  
499 extracted DNA and PCR amplicon between non- and pre-processed sediment samples.  
500 Raw and quality-filtered reads were significantly different between methods, but read  
501 abundance after bioinformatics processing were not significantly different. These results  
502 suggest that read abundance after the bioinformatics steps were not significantly  
503 influenced by sediment processing or lack thereof. We report that although the non- and  
504 pre-processed sediment samples had more unique than shared ASVs, both methods  
505 shared a total of 239 ASVs that accounts for 74% of the reads. More so at the genus  
506 level, the final collection filter also detected most of the genus identified from the non-  
507 processed samples, with 51 false-negatives (2% of the reads) and 59 false-positive  
508 genera (3% of the reads). All of the alpha diversity indices estimated, and the microbial  
509 community composition was not significantly different between the non- and pre-  
510 processed samples. These results demonstrate that while differences in shared and  
511 unique ASVs and microbial taxa were detected, both methods revealed comparable  
512 microbial diversity and community composition. We also suggest the inclusion of  
513 sequential filters (i.e., pre- and mid-filters) in the community profiling, given the additional



514 taxa not detected from the non-processed and the final collection filter. We presented the  
515 feasibility of pre-processing sediment samples for community analysis and the need for  
516 further assessment sampling strategies to help conceptualize appropriate study designs  
517 for sediment-associated microbial community profiling.

## 518 **Conflict of Interest**

519 The authors declare that the research was conducted in the absence of any commercial  
520 or financial relationships that could be construed as a potential conflict of interest.

## 521 **Author Contributions**

522 JMS performed field sampling and sample processing. JMS and KW conceptualized the  
523 study, analyzed the data, and wrote the manuscript.

## 524 **Funding**

525 This work was supported by the Japan Society for the Promotion of Science (JSPS)  
526 Grant-in-Aid for Scientific Research (Grant No. 17H01666, 19K21996, and 19H02276).

## 527 **Acknowledgments**

528 We are grateful to Dr. Bin Li of the Molecular Ecology and Health Laboratory (MEcoH),  
529 Ehime University, members of the Disaster Prevention Research Institute (DPRI), Kyoto  
530 University, and Dr. David Gaeuman of the Trinity River Restoration Program (TRRP) for  
531 their assistance during the field survey. We thank Dr. Naohito Tokunaga of the Division  
532 of Analytical Bio-Medicine for his assistance in performing high-throughput sequencing  
533 on the Illumina MiSeq platform of the Advanced Research Support Center (ADRES),  
534 Ehime University.

## 535 **References**

- 536 Albers, C. N., Jensen, A., Bælum, J., and Jacobsen, C. S. (2013). Inhibition of DNA polymerases used in  
537 Q-PCR by structurally different soil-derived humic substances. *Geomicrobiology Journal*, 30(8), 675-  
538 681.
- 539 Almeida, S. F., Elias, C., Ferreira, J., Tornés, E., Puccinelli, C., Delmas, F., ... and Mancini, L. (2014).  
540 Water quality assessment of rivers using diatom metrics across Mediterranean Europe: a methods  
541 intercalibration exercise. *Science of the Total Environment*, 476, 768-776.
- 542 Aylagas, E., Mendibil, I., Borja, Á., and Rodríguez-Ezpeleta, N. (2016). Marine sediment sample pre-  
543 processing for macroinvertebrates metabarcoding: mechanical enrichment and homogenization.  
544 *Frontiers in Marine Science*, 3, 203.

- 545 Bae, S., Lyons, C., and Onstad, N. (2019). A culture-dependent and metagenomic approach of household  
546 drinking water from the source to point of use in a developing country. *Water research X*, 2, 100026.
- 547 Bolyen, E., Rideout, J. R., Dillon, M. R., Bokulich, N. A., Abnet, C. C., Al-Ghalith, G. A., ... and Bai, Y.  
548 (2019). Reproducible, interactive, scalable and extensible microbiome data science using QIIME 2.  
549 *Nature biotechnology*, 1.
- 550 Browne, H. P., Forster, S. C., Anonye, B. O., Kumar, N., Neville, B. A., Stares, M. D., ... and Lawley, T. D.  
551 (2016). Culturing of 'unculturable' human microbiota reveals novel taxa and extensive sporulation.  
552 *Nature*, 533(7604), 543-546.
- 553 Callahan, B. J., McMurdie, P. J., Rosen, M. J., Han, A. W., Johnson, A. J. A., and Holmes, S. P. (2016).  
554 DADA2: high-resolution sample inference from Illumina amplicon data. *Nature methods*, 13(7), 581.
- 555 Caporaso, J. G., Lauber, C. L., Walters, W. A., Berg-Lyons, D., Huntley, J., Fierer, N., ... and Gormley, N.  
556 (2012). Ultra-high-throughput microbial community analysis on the Illumina HiSeq and MiSeq  
557 platforms. *The ISME journal*, 6(8), 1621.
- 558 Ficetola, G. F., Pansu, J., Bonin, A., Coissac, E., Giguët-Covex, C., De Barba, M., ... & Rayé, G. (2015).  
559 Replication levels, false presences and the estimation of the presence/absence from eDNA  
560 metabarcoding data. *Molecular ecology resources*, 15(3), 543-556.
- 561 Ficetola, G. F., Taberlet, P., & Coissac, E. (2016). How to limit false positives in environmental DNA and  
562 metabarcoding?. *Molecular ecology resources*, 16(3), 604-607.
- 563 Franzosa, E. A., Hsu, T., Sirota-Madi, A., Shafquat, A., Abu-Ali, G., Morgan, X. C., & Huttenhower, C.  
564 (2015). Sequencing and beyond: integrating molecular'omics' for microbial community  
565 profiling. *Nature Reviews Microbiology*, 13(6), 360-372.
- 566 Gaeuman, D. (2014). High-flow gravel injection for constructing designed in-channel features. *River  
567 Research and Applications*, 30(6), 685-706.
- 568 Harnpicharnchai, P., Thongaram, T., Sriprang, R., Champreda, V., Tanapongpipat, S., and Eurwilaichitr,  
569 L. (2007). An efficient purification and fractionation of genomic DNA from soil by modified troughing  
570 method. *Letters in applied microbiology*, 45(4), 387-391.
- 571 Harrell Jr, F. E., and Harrell Jr, M. F. E. (2019). Package 'Hmisc'. CRAN2018, 2019, 235-6.
- 572 Hill, V. R., Kahler, A. M., Jothikumar, N., Johnson, T. B., Hahn, D., and Cromeans, T. L. (2007). Multistate  
573 evaluation of an ultrafiltration-based procedure for simultaneous recovery of enteric microbes in 100-  
574 liter tap water samples. *Applied and Environmental Microbiology*, 73(13), 4218-4225.
- 575 Hunter, M. E., Ferrante, J. A., Meigs-Friend, G., & Ulmer, A. (2019). Improving eDNA yield and inhibitor  
576 reduction through increased water volumes and multi-filter isolation techniques. *Scientific Reports*,  
577 9(1), 1-9.
- 578 Hugerth, L. W., & Andersson, A. F. (2017). Analysing microbial community composition through amplicon  
579 sequencing: from sampling to hypothesis testing. *Frontiers in Microbiology*, 8, 1561.
- 580 Huptas, C., Scherer, S., & Wenning, M. (2016). Optimized Illumina PCR-free library preparation for  
581 bacterial whole genome sequencing and analysis of factors influencing de novo assembly. *BMC  
582 research notes*, 9(1), 269.
- 583 Kachiprath, B., Puthumana, J., Gopi, J., Solomon, S., Krishnan, K. P., & Philip, R. (2018). Amplicon  
584 sequencing based profiling of bacterial diversity from Krossfjorden, Arctic. *Data in brief*, 21, 2522-  
585 2525.
- 586 Kassambara, A. (2018). ggpubr: "ggplot2" based publication ready plots. R package version 0.1, 7.

- 587 Kosch, T. A., and Summers, K. (2013). Techniques for minimizing the effects of PCR inhibitors in the  
588 chytridiomycosis assay. *Molecular ecology resources*, 13(2), 230-236.
- 589 Lanzen, A., Simachew, A., Gessesse, A., Chmolowska, D., Jonassen, I., & Øvreås, L. (2013). Surprising  
590 prokaryotic and eukaryotic diversity, community structure and biogeography of Ethiopian soda lakes.  
591 *PLoS One*, 8(8), e72577.
- 592 Laroche, O., Wood, S. A., Tremblay, L. A., Lear, G., Ellis, J. I., & Pochon, X. (2017). Metabarcoding  
593 monitoring analysis: the pros and cons of using co-extracted environmental DNA and RNA data to  
594 assess offshore oil production impacts on benthic communities. *PeerJ*, 5, e3347.
- 595 Lear, G., Dickie, I., Banks, J., Boyer, S., Buckley, H. L., Buckley, T. R., ... and Kamke, J. (2018). Methods  
596 for the extraction, storage, amplification and sequencing of DNA from environmental samples. *New  
597 Zealand Journal of Ecology*, 42(1), 10-50A.
- 598 Lex, A., Gehlenborg, N., Strobel, H., Vuillemot, R., and Pfister, H. (2014). UpSet: visualization of  
599 intersecting sets. *IEEE transactions on visualization and computer graphics*, 20(12), 1983-1992.
- 600 Li, J., Lawson Handley, L. J., Read, D. S., & Hänfling, B. (2018). The effect of filtration method on the  
601 efficiency of environmental DNA capture and quantification via metabarcoding. *Molecular Ecology  
602 Resources*, 18(5), 1102-1114.
- 603 Liu, L., Liu, M., Wilkinson, D. M., Chen, H., Yu, X., & Yang, J. (2017). DNA metabarcoding reveals that  
604 200- $\mu$ m-size-fractionated filtering is unable to discriminate between planktonic microbial and large  
605 eukaryotes. *Molecular ecology resources*, 17(5), 991-1002.
- 606 Liao, H., Yu, K., Duan, Y., Ning, Z., Li, B., He, L., and Liu, C. (2019). Profiling microbial communities in a  
607 watershed undergoing intensive anthropogenic activities. *Science of The Total Environment*, 647,  
608 1137-1147.
- 609 Lloyd, K. G., MacGregor, B. J., and Teske, A. (2010). Quantitative PCR methods for RNA and DNA in  
610 marine sediments: maximizing yield while overcoming inhibition. *FEMS microbiology ecology*, 72(1),  
611 143-151.
- 612 Maejima, Y., Kushimoto, K., Muraguchi, Y., Fukuda, K., Miura, T., Yamazoe, A., ... & Shintani, M. (2018).  
613 Proteobacteria and Bacteroidetes are major phyla of filterable bacteria passing through 0.22  $\mu$ m pore  
614 size membrane filter, in Lake Sanaru, Hamamatsu, Japan. *Bioscience, Biotechnology, and  
615 Biochemistry*, 82(7), 1260-1263.
- 616 Martin, M. (2011). Cutadapt removes adapter sequences from high-throughput sequencing reads. *EMBnet.  
617 journal*, 17(1), 10-12.
- 618 Mathai, P. P., Dunn, H. M., Magnone, P., Zhang, Q., Ishii, S., Chun, C. L., & Sadowsky, M. J. (2019).  
619 Association between submerged aquatic vegetation and elevated levels of *Escherichia coli* and  
620 potential bacterial pathogens in freshwater lakes. *Science of the Total Environment*, 657, 319-324.
- 621 Matheson, C. D., Gurney, C., Esau, N., & Lehto, R. (2010). Assessing PCR inhibition from humic  
622 substances. *The Open Enzyme Inhibition Journal*, 3(1), 38-45.
- 623 McMurdie, P. J., and Holmes, S. (2013). phyloseq: an R package for reproducible interactive analysis and  
624 graphics of microbiome census data. *PloS one*, 8(4), e61217.
- 625 Mestre, M., Ruiz-González, C., Logares, R., Duarte, C. M., Gasol, J. M., & Sala, M. M. (2018). Sinking  
626 particles promote vertical connectivity in the ocean microbiome. *Proceedings of the National  
627 Academy of Sciences*, 115(29), E6799-E6807.

- 628 Nakai, R. (2020). Size Matters: Ultra-small and Filterable Microorganisms in the Environment. *Microbes*  
629 *and Environments*, 35(2), ME20025.
- 630 Ni, C., Horton, D. J., Rui, J., Henson, M. W., Jiang, Y., Huang, X., and Learman, D. R. (2016). High  
631 concentrations of bioavailable heavy metals impact freshwater sediment microbial communities.  
632 *Annals of Microbiology*, 66(3), 1003-1012.
- 633 Oksanen, J., Blanchet, F. G., Kindt, R., Legendre, P., Minchin, P. R., O'hara, R. B., ... and Oksanen, M. J.  
634 (2013). Package 'vegan'. *Community ecology package*, version, 2(9), 1-295.
- 635 Orsi, W. D., Smith, J. M., Wilcox, H. M., Swalwell, J. E., Carini, P., Worden, A. Z., & Santoro, A. E. (2015).  
636 Ecophysiology of uncultivated marine euryarchaea is linked to particulate organic matter. *The ISME*  
637 *journal*, 9(8), 1747-1763.
- 638 Padilla, C. C., Ganesh, S., Gantt, S., Huhman, A., Parris, D. J., Sarode, N., and Stewart, F. J. (2015).  
639 Standard filtration practices may significantly distort planktonic microbial diversity estimates.  
640 *Frontiers in Microbiology*, 6, 547.
- 641 Pawlowski, J., Lejzerowicz, F., Apotheloz-Perret-Gentil, L., Visco, J., and Esling, P. (2016). Protist  
642 metabarcoding and environmental biomonitoring: time for change. *European Journal of Protistology*,  
643 55, 12-25.
- 644 Payne, R. J. (2013). Seven reasons why protists make useful bioindicators. *Acta Protozoologica*, 52(3).
- 645 Pinto, F., Zolfo, M., Beghini, F., Armanini, F., Asnicar, F., Silverj, A., ... & Segata, N. (2020). A step-by-step  
646 sequence-based analysis of virome enrichment protocol for freshwater and sediment samples.  
647 bioRxiv. doi: <https://doi.org/10.1101/2020.09.17.302836>.
- 648 Poulain, A. J., Aris-Brosou, S., Blais, J. M., Brazeau, M., Keller, W. B., and Paterson, A. M. (2015). Microbial  
649 DNA records historical delivery of anthropogenic mercury. *The ISME journal*, 9(12), 2541.
- 650 Pruesse, E., Quast, C., Knittel, K., Fuchs, B. M., Ludwig, W., Peplies, J., and Glöckner, F. O. (2007). SILVA:  
651 a comprehensive online resource for quality checked and aligned ribosomal RNA sequence data  
652 compatible with ARB. *Nucleic acids research*, 35(21), 7188-7196.
- 653 Pruesse, E., Peplies, J., and Glöckner, F. O. (2012). SINA: accurate high-throughput multiple sequence  
654 alignment of ribosomal RNA genes. *Bioinformatics*, 28(14), 1823-1829.
- 655 Puigcorb , V., Ruiz-Gonz lez, C., Masqu , P., & Gasol, J. M. (2020). Sampling Device-Dependence of  
656 Prokaryotic Community Structure on Marine Particles: Higher Diversity Recovered by in situ Pumps  
657 Than by Oceanographic Bottles. *Frontiers in Microbiology*, 11, 1645.
- 658 R Core Team (2019). R: A language and environment for statistical computing. R Foundation for Statistical  
659 Computing, Vienna, Austria. URL <https://www.R-project.org/>.
- 660 Ricotta, C., & Podani, J. (2017). On some properties of the Bray-Curtis dissimilarity and their ecological  
661 meaning. *Ecological Complexity*, 31, 201-205.
- 662 Robson, H. L., Noble, T. H., Saunders, R. J., Robson, S. K., Burrows, D. W., & Jerry, D. R. (2016). Fine-  
663 tuning for the tropics: application of eDNA technology for invasive fish detection in tropical freshwater  
664 ecosystems. *Molecular ecology resources*, 16(4), 922-932.
- 665 Rohland, N., Glocke, I., Aximu-Petri, A., and Meyer, M. (2018). Extraction of highly degraded DNA from  
666 ancient bones, teeth and sediments for high-throughput sequencing. *Nature protocols*, 13(11), 2447-  
667 2461.
- 668 Sakami, T. (2019). Collection of Microbial DNA from Marine Sediments. In *Marine Metagenomics* (pp. 17-  
669 20). Springer, Singapore.

- 670 Segata, N., Izard, J., Waldron, L., Gevers, D., Miropolsky, L., Garrett, W. S., and Huttenhower, C. (2011).  
671 Metagenomic biomarker discovery and explanation. *Genome biology*, 12(6), 1-18.
- 672 Serrana, J. M., Yaegashi, S., Kondoh, S., Li, B., Robinson, C. T., & Watanabe, K. (2018). Ecological  
673 influence of sediment bypass tunnels on macroinvertebrates in dam-fragmented rivers by DNA  
674 metabarcoding. *Scientific reports*, 8(1), 1-10.
- 675 Serrana, J. M., Li, B., Sumi, T., Takemon, Y., and Watanabe, K. (2020). Profiling the microbial community  
676 structure and functional diversity of a dam-regulated river undergoing gravel bar restoration. *bioRxiv*.  
677 doi: <https://doi.org/10.1101/2020.01.25.919381>.
- 678 Schultz, D., Zühlke, D., Bernhardt, J., Francis, T. B., Albrecht, D., Hirschfeld, C., ... & Riedel, K. (2020). An  
679 optimized metaproteomics protocol for a holistic taxonomic and functional characterization of  
680 microbial communities from marine particles. *Environmental Microbiology Reports*.
- 681 Singer, E., Bushnell, B., Coleman-Derr, D., Bowman, B., Bowers, R. M., Levy, A., ... and Hallam, S. J.  
682 (2016). High-resolution phylogenetic microbial community profiling. *The ISME journal*, 10(8), 2020-  
683 2032.
- 684 Smith, M. W., Zeigler Allen, L., Allen, A. E., Herfort, L., & Simon, H. M. (2013). Contrasting genomic  
685 properties of free-living and particle-attached microbial assemblages within a coastal ecosystem.  
686 *Frontiers in microbiology*, 4, 120.
- 687 Smith, M. W., Herfort, L., Fortunato, C. S., Crump, B. C., & Simon, H. M. (2017). Microbial players and  
688 processes involved in phytoplankton bloom utilization in the water column of a fast-flowing, river-  
689 dominated estuary. *MicrobiologyOpen*, 6(4), e00467.
- 690 Solomon, S., Kachiprath, B., Jayanath, G., Sajeevan, T. P., Singh, I. B., and Philip, R. (2016). High-quality  
691 metagenomic DNA from marine sediment samples for genomic studies through a pre-processing  
692 approach. *3 Biotech*, 6(2), 160.
- 693 Song, S. J., Amir, A., Metcalf, J. L., Amato, K. R., Xu, Z. Z., Humphrey, G., & Knight, R. (2016). Preservation  
694 methods differ in fecal microbiome stability, affecting suitability for field studies. *MSystems*, 1(3).
- 695 Stern, N., Ginder-Vogel, M., Stegen, J. C., Arntzen, E., Kennedy, D. W., Larget, B. R., and Roden, E. E.  
696 (2017). Colonization habitat controls biomass, composition, and metabolic activity of attached  
697 microbial communities in the Columbia River hyporheic corridor. *Applied and environmental  
698 microbiology*, 83(16).
- 699 Stewart, F. J., Dalsgaard, T., Young, C. R., Thamdrup, B., Revsbech, N. P., Ulloa, O., ... and DeLong, E.  
700 F. (2012). Experimental incubations elicit profound changes in community transcription in OMZ  
701 bacterioplankton. *PLoS One*, 7(5), e37118.
- 702 Sudarshan A. Shetty, and Leo Lahti. (2018). *microbiomeutilities*: An R package for utilities to guide in-depth  
703 marker gene amplicon data analysis (Version 0.99.00). Zenodo. DOI:10.5281/zenodo.1471685.
- 704 Tan, G., Opitz, L., Schlapbach, R., & Rehrauer, H. (2019). Long fragments achieve lower base quality in  
705 Illumina paired-end sequencing. *Scientific reports*, 9(1), 1-7.
- 706 Teeling, H., Fuchs, B. M., Becher, D., Klockow, C., Gardebrecht, A., Bennis, C. M., ... & Weber, M. (2012).  
707 Substrate-controlled succession of marine bacterioplankton populations induced by a phytoplankton  
708 bloom. *Science*, 336(6081), 608-611.
- 709 Torres-Beltrán, M., Mueller, A., Scofield, M., Pachiadaki, M. G., Taylor, C., Tyshchenko, K., ... & Hyun, J.  
710 H. (2019). Sampling and processing methods impact microbial community structure and potential

- 711 activity in a seasonally anoxic fjord: Saanich Inlet, British Columbia. *Frontiers in Marine Science*, 6,  
712 132.
- 713 Ushio, M. (2019). Use of a filter cartridge combined with intra-cartridge bead-beating improves detection  
714 of microbial DNA from water samples. *Methods in Ecology and Evolution*, 10(8), 1142-1156.
- 715 Wang, Y., Hammes, F., Boon, N., & Egli, T. (2007). Quantification of the filterability of freshwater bacteria  
716 through 0.45, 0.22, and 0.1  $\mu\text{m}$  pore size filters and shape-dependent enrichment of filterable  
717 bacterial communities. *Environmental Science & Technology*, 41(20), 7080-7086.
- 718 Wickham, H., Chang, W., and Wickham, M. H. (2016). Package 'ggplot2'. Create Elegant Data  
719 Visualisations Using the Grammar of Graphics. Version, 2(1), 1-189.
- 720 Zhou, J., Bruns, M. A., and Tiedje, J. M. (1996). DNA recovery from soils of diverse composition. *Appl.*  
721 *Environ. Microbiol.*, 62(2), 316-322.

## 722 **Supplementary Material**

723 The Supplementary Material for this article is submitted as an attachment: MS-Sediment-  
724 Filtering\_SuppMat.pdf.

## 725 **Data Availability Statement**

726 The raw sequence data were deposited into the National Center for Biotechnology  
727 Information (NCBI) Sequence Read Archive (SRA) under the accession number  
728 PRJNA559761. The ASV matrix, the taxonomy and sample table generated in this study  
729 have been deposited in the Figshare data repository (10.6084/m9.figshare.13088834).

## 730 FIGURES

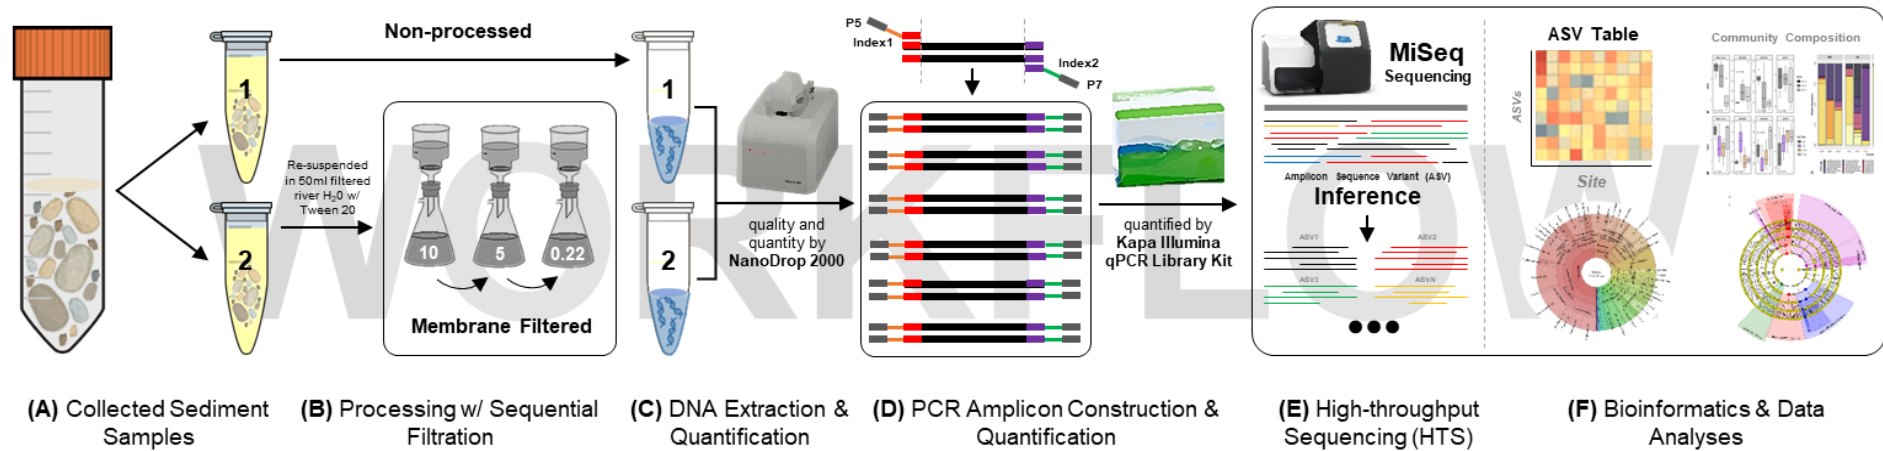

731

732 **Figure 1.** Schematic overview of the experimental procedure of the sediment-associated microbial community profiling employed in this  
 733 study. Collection of sediment samples **(A)**. Sequential membrane filtration from 10, 5 to 0.22  $\mu\text{m}$  pore size filters as pre-processing step  
 734 **(B)**. DNA extraction following the protocol of Zhou et al. (1996) (as employed in Solomon et al., 2016) with some modifications **(C)**. One-  
 735 step PCR amplification of the 16s rRNA V4 hypervariable region **(D)**. Sequencing through the Illumina MiSeq Platform **(E)**. Bioinformatics  
 736 and statistical data analysis were done in R (R Core Team, 2019) **(F)**.

Pre-processing for Sediment Microbial Community Profiling

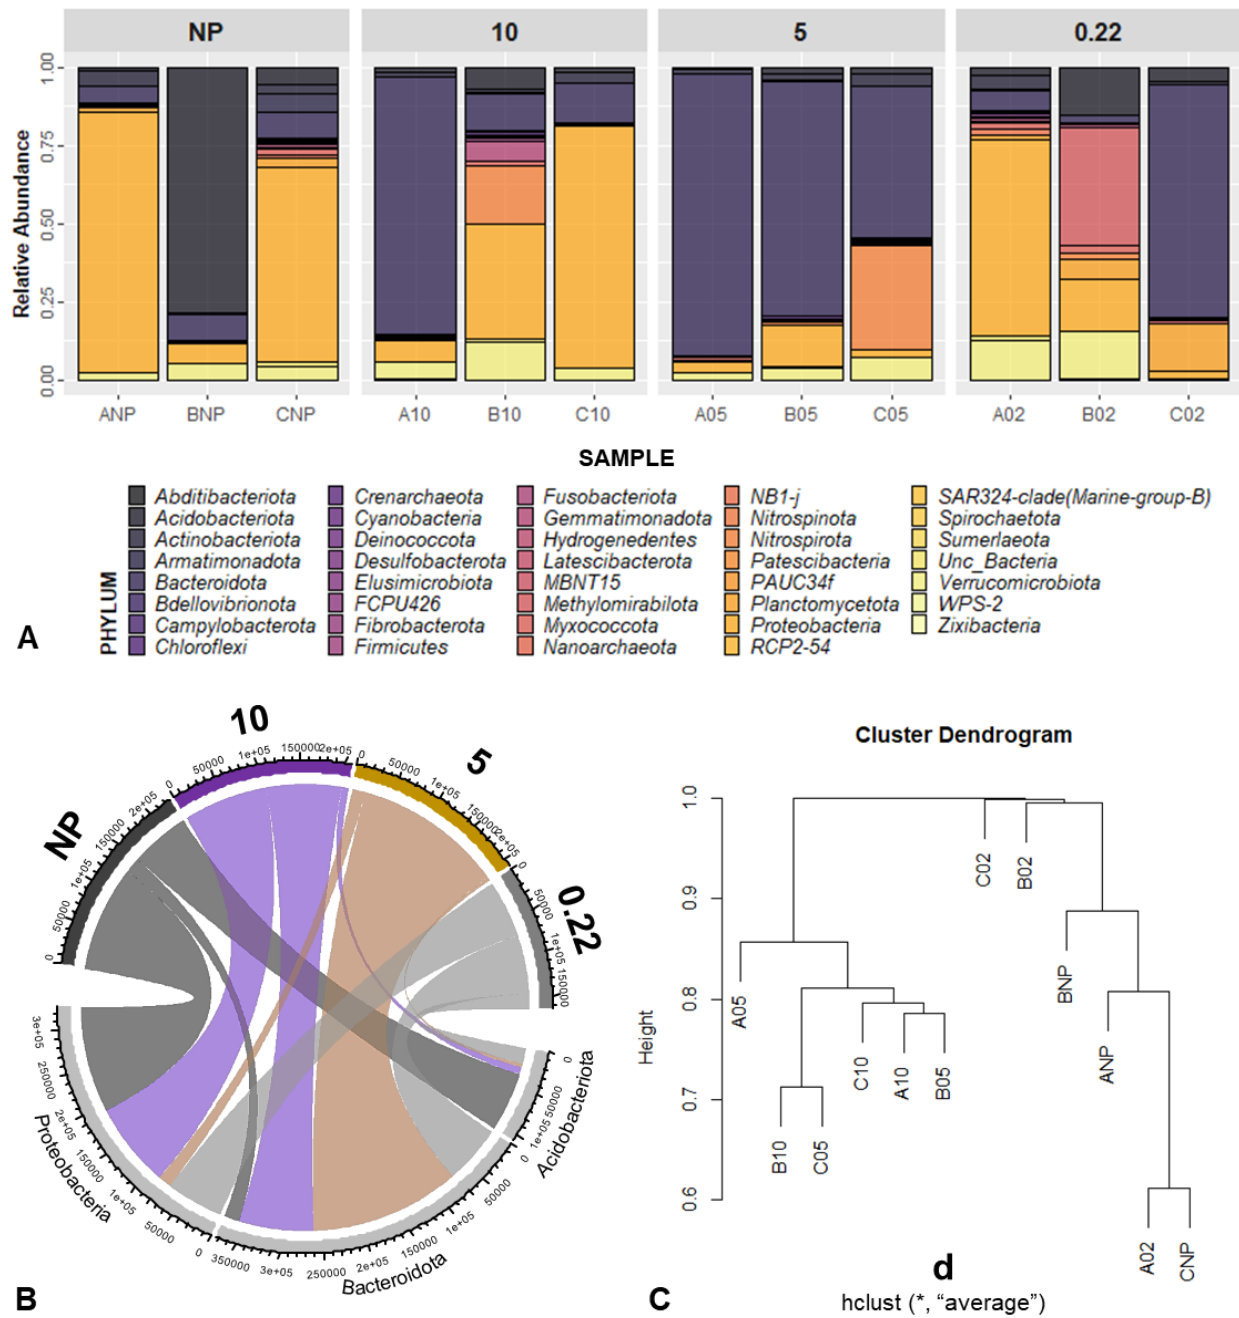

737

738 **Figure 2.** Relative abundance of microorganisms identified by 16s rDNA amplicon  
 739 sequencing (A). Compositions are illustrated at the phylum level. The chord diagram  
 740 indicating the log-transformed abundance of the top three Phylum detected for each  
 741 filters (B). Hierarchical clustering dendrogram of the similarity in community composition  
 742 across the sampling sites (C).



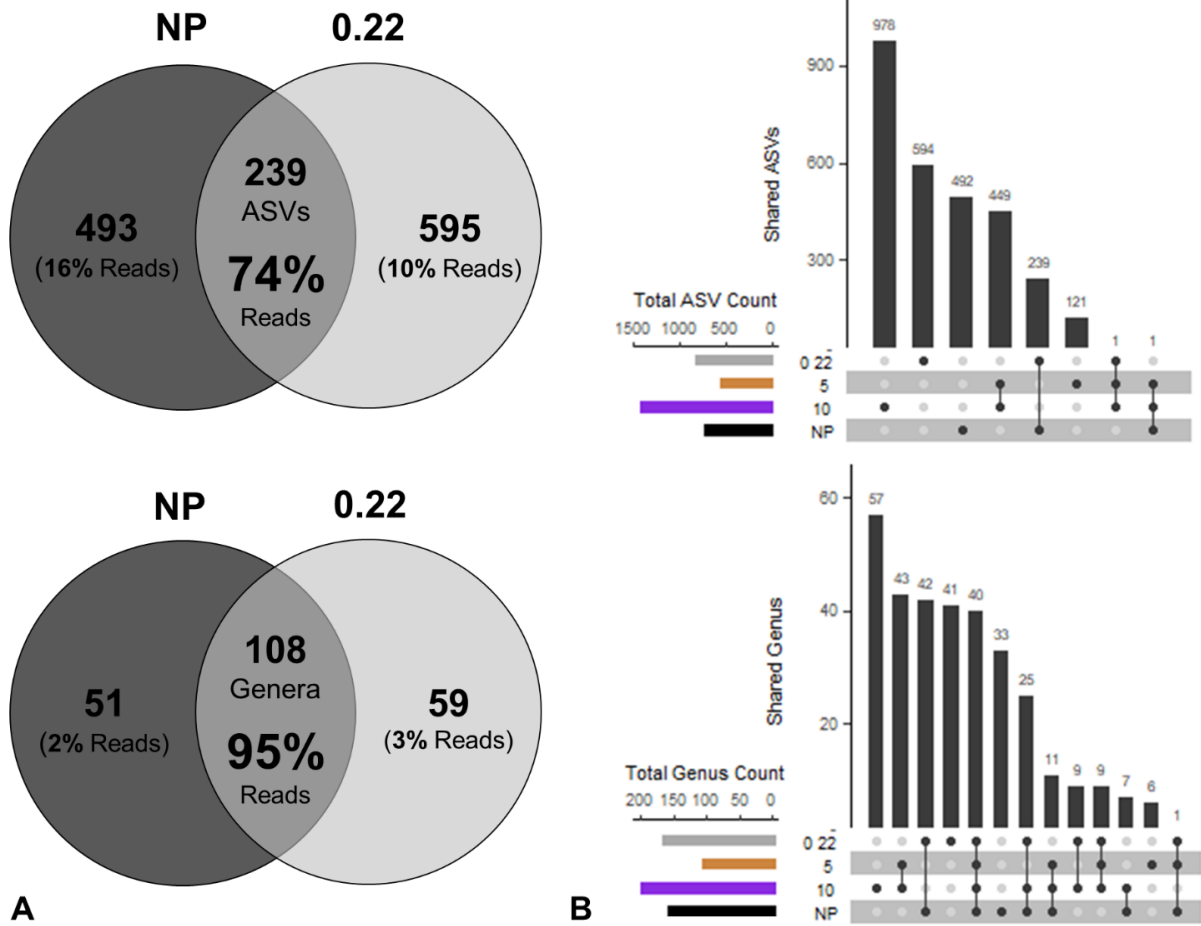

743

744 **Figure 3.** Venn Diagrams **(A)** and UpSetR plots **(B)** showing shared and unique ASVs  
745 and genus between the non-processed (NP) and pre-processed samples (represented  
746 by the collection filter, 0.22 μm), and between all groups (NP, 10, 5, and 0.22 μm)  
747 sediment samples. The bars in the upset plot show the overlap between the indicated  
748 sample below.

## Pre-processing for Sediment Microbial Community Profiling

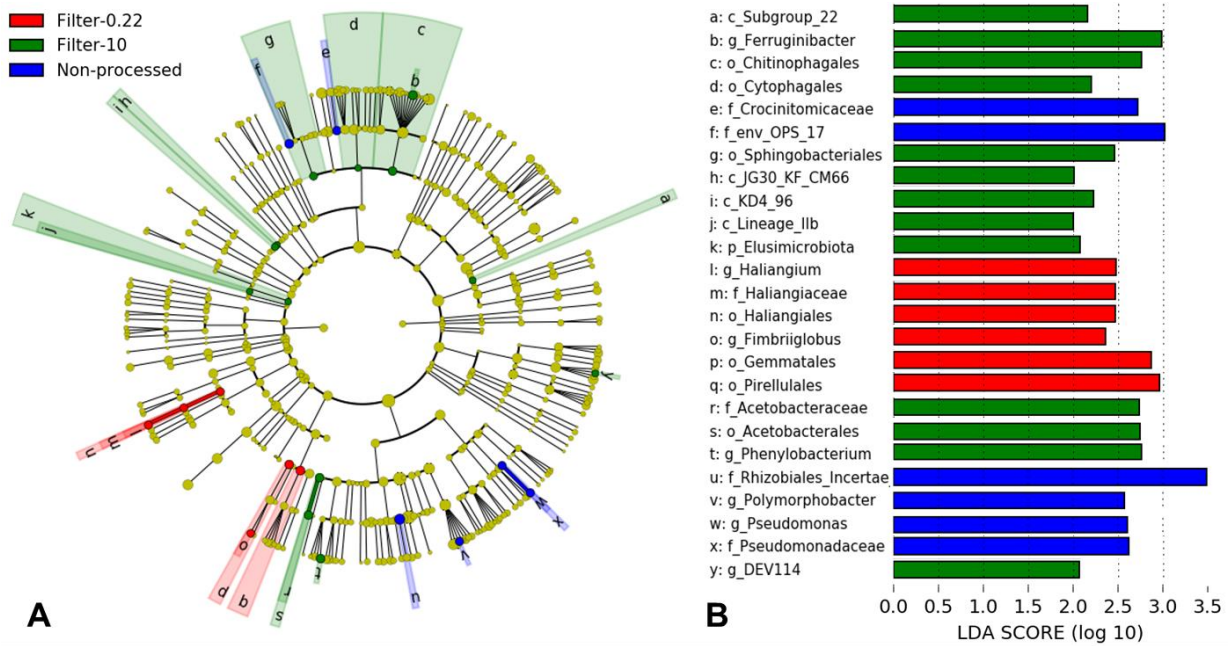

749

750 **Figure 4.** Linear Discriminant Analysis (LDA) Effect Size (LEfSe) plot of indicator taxa  
751 identified from non-processed (NP), and sequential filtered (10, 5, and 0.22  $\mu$ m) sediment  
752 samples. Cladogram representing the hierarchical structure of the indicator taxa  
753 identified between the non-processed and filtered samples (filter) **(A)**. Each filled circle  
754 represents one indicator taxa. Blue, indicator taxa statistically overrepresented in "NP";  
755 red indicator taxa statistically overrepresented in "0.22"; green, indicator taxa statistically  
756 overrepresented in "10". Identified indicator taxa grouped by filter and ranked by effect  
757 size **(B)**. The threshold for LDA score was >2.0.

## 758 TABLES

759 **Table 1.** Quality and quantity of extracted DNA, PCR amplicon, and HTS-read and amplicon sequence variant (ASV) count per sediment  
 760 sample.

| Site         | Code | Filter Type | Extracted DNA <sup>a</sup> |                                    |                                    | Amplicon Library       |           |      | Read Processing  |                  |                  |                  | Taxonomic Assignment |                |
|--------------|------|-------------|----------------------------|------------------------------------|------------------------------------|------------------------|-----------|------|------------------|------------------|------------------|------------------|----------------------|----------------|
|              |      |             | ng/ul                      | A <sub>260</sub> /A <sub>280</sub> | A <sub>260</sub> /A <sub>230</sub> | qPCR (nM) <sup>b</sup> | Size (bp) | Band | Raw Reads        | Quality Filtered | Denoised         | Non-Chimeric     | Reads w/ Tax. ID     | ASVs w/ Tax ID |
| A            | ANP  | NP          | 307.1                      | 1.4                                | 0.46                               | 4.88                   | 410       | 1    | 1,166,991        | 560,891          | 456,284          | 446,586          | 424,397              | 461            |
|              | A02  | 0.22        | 479.7                      | 1.37                               | 0.61                               | 14.16                  | 409       | 2    | 305,045          | 171,106          | 154,579          | 147,490          | 143,019              | 436            |
|              | A05  | 5           | 110.1                      | 1.43                               | 5                                  | 45.97                  | 408       | 1    | 73,962           | 40,433           | 32,181           | 31,458           | 30,146               | 183            |
|              | A10  | 10          | 619.2                      | 1.45                               | 0.37                               | 56.53                  | 413       | 1    | 260,341          | 148,596          | 112,796          | 105,220          | 96,643               | 633            |
| B            | BNP  | NP          | 625.5                      | 1.45                               | 0.3                                | 56.79                  | 413       | 1    | 446,984          | 135,890          | 87,857           | 86,948           | 85,109               | 75             |
|              | B02  | 0.22        | 397.9                      | 1.61                               | 0.75                               | 27.33                  | 414       | 1    | 79,771           | 29,699           | 22,339           | 22,153           | 20,745               | 104            |
|              | B05  | 5           | 44.3                       | 2.53                               | 0.06                               | 8.34                   | 415       | 1    | 146,808          | 101,535          | 86,288           | 82,169           | 77,590               | 465            |
|              | B10  | 10          | 35.8                       | 3.08                               | 0.04                               | 17.38                  | 415       | 1    | 182,665          | 135,387          | 125,620          | 112,804          | 105,066              | 1,071          |
| C            | CNP  | NP          | 107.1                      | 1.67                               | 0.13                               | 1.44                   | 396       | 1    | 790,386          | 381,687          | 285,719          | 275,483          | 113,715              | 426            |
|              | C02  | 0.22        | 2.3                        | 1.86                               | 0.09                               | 76.9                   | 412       | 2    | 112,123          | 61,001           | 54,375           | 50,476           | 46,631               | 295            |
|              | C05  | 5           | 5.1                        | 1.03                               | 0.17                               | 43.23                  | 411       | 3    | 23,323           | 14,327           | 12,515           | 10,757           | 9,582                | 141            |
|              | C10  | 10          | 7.6                        | 5.1                                | 0.03                               | 4.4                    | 388       | 2    | 217,176          | 138,449          | 97,116           | 94,199           | 89,877               | 460            |
| <b>Total</b> |      |             |                            |                                    |                                    |                        |           |      | <b>3,805,575</b> | <b>1,919,001</b> | <b>1,527,669</b> | <b>1,465,743</b> | <b>1,242,520</b>     | <b>2,875</b>   |

<sup>a</sup>Initial quantification and quality assessment of extracted DNA via NanoDrop Spectrophotometer. <sup>b</sup>Amplicon library quantification via Kappa Illumina Library Quantification Kit. <sup>c</sup>DNA Assay for fragment size quantification and quality via Agilent 2100 BioAnalyzer High Sensitivity DNA Kit. "NP" stands for non-processed sediment samples; "10" for the pre-filter (10 µm), "5" for the mid-filter (5 µm), and "0.22" for the collection filter (0.22 µm).

761
